# Supplementary material for: Fast screening of porous materials for noble gas adsorption and separation: a classical density functional approach
Source: Royal Society of Chemistry journal article supplement (doi:10.1039/c8cp03777a), 2018-01-01
Supplement: c8cp03777a3.xlsx [file c8cp03777a3.xlsx]

## Sheet: Table_S1
code	CSD REF.CODE
E-1	ABAVIJ
E-2	ABAVOP
E-3	ABEMIF
E-4	ABEXEM
E-5	ABEXIQ
E-6	ABEXOW
E-7	ABEXUC
E-8	ABEYAJ
E-9	ABEYEN
E-10	ABEYIR
E-11	ABIXOZ
E-12	ABIYIV
E-13	ABUWOJ
E-14	ACAJOF
E-15	ACAKUM
E-16	ACALIB
E-17	ACECIV
E-18	ACIBIY
E-19	ACIBOE
E-20	ACMPCD
E-21	ACODON
E-22	ACOGAB
E-23	ACOGEF
E-24	ACOLEL
E-25	ACOLIP
E-26	ACOLOV
E-27	ACOLUB
E-28	ACUBAB
E-29	ACUFEK
E-30	ACUJOZ
E-31	ACUTOI
E-32	ADABAK01
E-33	ADABIS
E-34	ADABUE
E-35	ADARAA
E-36	ADASAB
E-37	ADASEF
E-38	ADASIJ
E-39	ADASOP
E-40	ADASUV
E-41	ADATAC
E-42	ADATEG
E-43	ADATIK
E-44	ADAXEK
E-45	ADEGIA
E-46	ADIQEL
E-47	ADOBAX
E-48	ADOBEB
E-49	ADOBOL
E-50	ADOBUR
E-51	ADOCAY
E-52	ADOCIG
E-53	ADODAA
E-54	ADODII
E-55	ADODOO
E-56	ADODUU
E-57	ADUROI
E-58	ADUWIH
E-59	AFEDIA
E-60	AFEJOK
E-61	AFIPAH
E-62	AFITEP
E-63	AFITIT
E-64	AFITUF
E-65	AFIXAO
E-66	AFIXES
E-67	AFOQUI
E-68	AFOTOF
E-69	AFOTUL
E-70	AFOVAT
E-71	AFOVEX
E-72	AFOVIB
E-73	AFOVOH
E-74	AFOYOK
E-75	AFUKAP
E-76	AFUKET
E-77	AFUPEX
E-78	AGARUW
E-79	AGAXOV
E-80	AGESIP
E-81	AGUVOO
E-82	AGUWUV
E-83	AHINIP
E-84	AHOKIR01
E-85	AHUTIH
E-86	AHUTIH01
E-87	AJAYIT
E-88	AJOVEB
E-89	AKAYIV
E-90	AKUHOD
E-91	AKUHOD01
E-92	AKUHOD03
E-93	ALALUU
E-94	ALALUU01
E-95	ALAMUW
E-96	ALANAD
E-97	ALIXAU
E-98	ALIXOJ
E-99	ALIXUP
E-100	ALOLES
E-101	ALOLET
E-102	ALOLIX
E-103	ALUJEX
E-104	ALUJIB
E-105	ALUJOH
E-106	ALUJUN
E-107	ALUKAU
E-108	ALUKIC
E-109	ALUKOI
E-110	ALUKUO
E-111	ALULAV
E-112	ALULEZ
E-113	ALULID
E-114	ALURAB
E-115	ALUREF
E-116	ALURIJ
E-117	AMAFOK
E-118	AMAGAX
E-119	AMALND
E-120	AMEJIM
E-121	AMEJOS
E-122	AMIKOX
E-123	AMILOY
E-124	AMILUE
E-125	AMIMAL
E-126	AMIMEP
E-127	AMIWID
E-128	AMIWOJ
E-129	AMIWUP
E-130	AMIXAW
E-131	AMIXEA
E-132	AMODUC
E-133	AMOFAK
E-134	AMOYOR
E-135	AMOZAE
E-136	AMUCOB
E-137	AMUWIP
E-138	AMUWUB
E-139	AMUXAI
E-140	ANENEN
E-141	ANENIR
E-142	ANEPIT
E-143	ANOMUM
E-144	ANONAT
E-145	ANUGEW
E-146	ANUGIA
E-147	ANUGOG
E-148	ANUGUM
E-149	APEBED
E-150	AQALIO
E-151	AQALOU
E-152	AQETIA
E-153	AQETUM
E-154	AQMAND
E-155	AQMAND01
E-156	AQODOA
E-157	AQUCOF
E-158	AQUDAS
E-159	ARIBOS
E-160	AROFAP
E-161	AROFET
E-162	ASACON
E-163	ASADAA
E-164	ASALIP
E-165	ATAFIK
E-166	ATIBAG
E-167	ATIBIO
E-168	ATIBOU
E-169	ATIBOU01
E-170	ATIBUA
E-171	ATICAH
E-172	ATICEL
E-173	ATIJUJ
E-174	ATOTIM
E-175	ATOWIQ
E-176	ATOWOW
E-177	ATOXEN
E-178	AVAQIX
E-179	AVELOD
E-180	AVELUJ
E-181	AVEMAQ
E-182	AVEMOE
E-183	AVESAW
E-184	AVIMOI
E-185	AVIMUO
E-186	AVIPAX
E-187	AVOSIO
E-188	AVUDAX
E-189	AVUPIR
E-190	AWAGEL
E-191	AWAHAI
E-192	AWAHEM
E-193	AWAWUR
E-194	AWEBIO
E-195	AWEDOW
E-196	AWEDUC
E-197	AWEGEP
E-198	AWEJIW
E-199	AWOFOI
E-200	AXINAX01
E-201	AXINIF
E-202	AXOCEW
E-203	AXOHIE
E-204	AXUBAW
E-205	AXUBOL
E-206	AXUHAD
E-207	AXUHEH
E-208	AXUHIL
E-209	AYUWUM
E-210	AZILEA
E-211	AZIXUD
E-212	AZOBUN
E-213	BACMOH
E-214	BACMOH10
E-215	BAEDTA01
E-216	BAHGUN
E-217	BAHGUN01
E-218	BAHGUN02
E-219	BAHGUN03
E-220	BAHGUN04
E-221	BAHMAZ
E-222	BAKGAX
E-223	BAKGIF
E-224	BAKJEE
E-225	BAKJII
E-226	BAKJOO
E-227	BAKLIK
E-228	BALMUW
E-229	BALMUW01
E-230	BANMAG
E-231	BARZAW
E-232	BARZIE
E-233	BARZOK
E-234	BARZOL
E-235	BARZUR
E-236	BASJUB
E-237	BASSOF
E-238	BASSUL
E-239	BASTAS
E-240	BASTEW
E-241	BASTIA
E-242	BASTUM
E-243	BAWRUO
E-244	BAXREY
E-245	BAXSIE
E-246	BAZDAJ
E-247	BAZFUF
E-248	BAZGAM
E-249	BAZGEQ
E-250	BAZJET
E-251	BAZJIX
E-252	BEDYEQ
E-253	BEFGEA
E-254	BEGBOG
E-255	BEKSAM
E-256	BEKYOG
E-257	BEKYUM
E-258	BEKZEX
E-259	BEKZEX01
E-260	BELJIL
E-261	BELTOD
E-262	BELTUJ
E-263	BELVAR
E-264	BELVEV
E-265	BELYIC
E-266	BENXUP
E-267	BEPLUF
E-268	BEPMAM
E-269	BEPMEQ
E-270	BEPMIU
E-271	BEPNIV
E-272	BEPNOB
E-273	BEPNUH
E-274	BEPPAP
E-275	BEPPIX
E-276	BEPPOD
E-277	BEPRIZ
E-278	BEPROF
E-279	BEPVAV
E-280	BEPVEZ
E-281	BEPVID
E-282	BEPVOJ
E-283	BEPVOJ01
E-284	BEPYIG
E-285	BEQFEK
E-286	BERFIP
E-287	BERGAI
E-288	BETDAH
E-289	BETDEL
E-290	BETDIP
E-291	BETDUB
E-292	BETFAJ
E-293	BETFEN
E-294	BETFUD
E-295	BETGAK
E-296	BETZOR
E-297	BEVQID
E-298	BEVQUP
E-299	BEVRAW
E-300	BEWRUR
E-301	BEWSAY
E-302	BEXPAX
E-303	BEXRUT
E-304	BEXSAA
E-305	BEXSII
E-306	BEXTUV
E-307	BEXVEH
E-308	BEYSEF
E-309	BEZSIK
E-310	BIBBUL
E-311	BIBXOB
E-312	BIBXUH
E-313	BICDAU
E-314	BICPUA
E-315	BIFKEI
E-316	BIHMUC
E-317	BIJDUV
E-318	BIJFAD
E-319	BIMDEF
E-320	BIMDIL
E-321	BIMDOR
E-322	BINCUY
E-323	BINDAF
E-324	BIVXEK
E-325	BIWSEG
E-326	BIWSIK
E-327	BIWYAH10
E-328	BOCKOT
E-329	BOHGOU
E-330	BOJCIN
E-331	BOLPAU
E-332	BOLPEY
E-333	BOMCUB
E-334	BONMEX
E-335	BONNIC
E-336	BONWAD
E-337	BONWIL
E-338	BORBEQ
E-339	BOWQAG
E-340	BOXFAW
E-341	BOXFOK
E-342	BUCROH
E-343	BUCSIC
E-344	BUCYAA
E-345	BUDDIO
E-346	BUFNEW
E-347	BUFNOG
E-348	BUFPAU
E-349	BUFPAU01
E-350	BUGSAY
E-351	BUGSEC
E-352	BUGSIG
E-353	BUGSOM
E-354	BUKMUQ
E-355	BURJOO
E-356	BUSGIG
E-357	BUSGOM
E-358	BUSQEM
E-359	BUSQIQ
E-360	BUSQUC
E-361	BUVXOG
E-362	BUVYEX
E-363	BUVYIB
E-364	BUWGAC
E-365	BUWGEG
E-366	BUYNAL
E-367	CABQEB
E-368	CADPII
E-369	CADQAB
E-370	CADQOP
E-371	CAGSAG
E-372	CAHLEE
E-373	CAHNEF
E-374	CAHSOU
E-375	CAJQEL
E-376	CAJQIP
E-377	CAJVUG
E-378	CAJWAN
E-379	CAJWER
E-380	CAJWIV
E-381	CAKFEB
E-382	CAKFIF
E-383	CAKXET
E-384	CAKXIX
E-385	CAKXOD
E-386	CAKXUJ
E-387	CAKYAQ
E-388	CAKYEU
E-389	CAKYIY
E-390	CANRIU
E-391	CANROA
E-392	CANRUG
E-393	CANYIB
E-394	CARGEI
E-395	CATART03
E-396	CAVMOD
E-397	CAVPEW
E-398	CAVPIA
E-399	CAVPUM
E-400	CAVRAU
E-401	CAVREY
E-402	CAVSOJ
E-403	CAVSUP
E-404	CAVTAW
E-405	CAWDOU
E-406	CAWDOU01
E-407	CAWDOU02
E-408	CAWGAJ
E-409	CAWVIH
E-410	CAWZUX
E-411	CAXPEY
E-412	CAXPIC
E-413	CAXSUR
E-414	CAXTUS
E-415	CAXVII
E-416	CAXVOO
E-417	CAXVUU
E-418	CAXWAB
E-419	CAXWEF
E-420	CAXWIJ
E-421	CAXXAC
E-422	CAXXEG
E-423	CAXZOS
E-424	CAYCAI
E-425	CAYCEL
E-426	CAYDEN
E-427	CAYDIR
E-428	CAYKEU
E-429	CAYMIZ
E-430	CAYQUQ
E-431	CAYSIE
E-432	CAYSOK
E-433	CAYYEG
E-434	CAZFOA
E-435	CAZGIT
E-436	CAZNEY
E-437	CAZNIC
E-438	CAZNOI
E-439	CAZNUO
E-440	CDLGLU01
E-441	CDLGLU02
E-442	CDLGLU10
E-443	CDLGLU11
E-444	CDLGLU12
E-445	CEBDOD
E-446	CECVAI
E-447	CECVIQ
E-448	CECVOW
E-449	CEDFIC
E-450	CEFLEF
E-451	CEGDUO
E-452	CEGFAW
E-453	CEGWER
E-454	CEHKUW
E-455	CEHLAD
E-456	CEHPIP
E-457	CEHWIX
E-458	CEHWOD
E-459	CEHZAR
E-460	CEHZAR01
E-461	CEJBEA
E-462	CEJZAU
E-463	CEKHIL
E-464	CELKEL
E-465	CELZEA
E-466	CELZIE
E-467	CENJIQ
E-468	CENKAJ
E-469	CENPUI
E-470	CEQBUV
E-471	CERMIV
E-472	CESYEF
E-473	CESYEF01
E-474	CETFOX
E-475	CETFUD
E-476	CETGOY
E-477	CETHEQ
E-478	CETJAN
E-479	CETVAA
E-480	CEXHET
E-481	CEXSEE
E-482	CEYPUT
E-483	CEZFIY
E-484	CEZNAY
E-485	CICYIX
E-486	CIDKUX
E-487	CIFDOM
E-488	CIFDUS
E-489	CIFJAE
E-490	CIFMEL
E-491	CIFMIP
E-492	CIGDUT
E-493	CIGFAB
E-494	CIGFEF
E-495	CIGXIA
E-496	CIGYAU
E-497	CIJBEE
E-498	CIJVOH
E-499	CIJVOH01
E-500	CILDAD
E-501	CIPREZ
E-502	CIPRID
E-503	CIQYUX
E-504	CISMAT01
E-505	CITXUZ
E-506	CITZIP
E-507	CIVTEH
E-508	CIWRAC
E-509	CIWREG
E-510	CIWROQ
E-511	CIWRUW
E-512	CIWSAD
E-513	CIWYUD
E-514	CIXCAO
E-515	COBWEV
E-516	COCMAJ
E-517	CODFEH
E-518	CODROD
E-519	CODRUJ
E-520	COGNAO
E-521	COGWEB
E-522	COJGEO
E-523	COJHIT
E-524	COMDOY
E-525	COMGUH
E-526	COPXOV
E-527	COWMAD
E-528	COWMEH
E-529	COWMIL
E-530	COWMOR
E-531	COWMUX
E-532	COWPOU
E-533	COWXOC
E-534	COXQUB
E-535	COXXIX
E-536	COYCEZ
E-537	COYCID
E-538	COYTEQ
E-539	COYTIU
E-540	COYTOA
E-541	COYTUG
E-542	COYTUG01
E-543	COYVAO
E-544	COYVAO01
E-545	COYVES
E-546	COYVES01
E-547	COZMUA
E-548	CUCKIV
E-549	CUCSAU
E-550	CUGLTM
E-551	CUGLTM01
E-552	CUGLTM02
E-553	CUHPUR
E-554	CUIMDZ01
E-555	CUKVUA
E-556	CUKXOW
E-557	CUKXUC
E-558	CUKYAJ
E-559	CUMDIY
E-560	CUMDOE
E-561	CUNFOH
E-562	CUNFOH01
E-563	CUNWEO
E-564	CUNXIS
E-565	CUNXIS10
E-566	CURBOH
E-567	CUSDIE
E-568	CUTFON
E-569	CUTFUT
E-570	CUTKOS
E-571	CUVGIK
E-572	CUVGOQ
E-573	CUVHEH
E-574	CUVHIL
E-575	CUVHIL01
E-576	CUVHIL02
E-577	CUVTUJ
E-578	CUVXAT
E-579	CUYHIO
E-580	CUYQIX
E-581	CUYRUK
E-582	CUYVOI
E-583	CUYWUP
E-584	CUYYAX
E-585	CUYYEB
E-586	DABWUA
E-587	DACXOV
E-588	DACXUB
E-589	DACYAI
E-590	DAGDIZ
E-591	DAGDUL
E-592	DAHTIQ
E-593	DAHWAM
E-594	DAJHOM
E-595	DAJHUS
E-596	DAKVOC
E-597	DAKVUI
E-598	DANZAV
E-599	DANZEZ
E-600	DANZID
E-601	DANZOJ
E-602	DAPBIH
E-603	DAPXEZ
E-604	DAPXID
E-605	DAPYAW
E-606	DARCOQ
E-607	DARCUW
E-608	DARDAD
E-609	DARDEH
E-610	DARDIL
E-611	DARDOR
E-612	DARDUX
E-613	DARFAF
E-614	DARFEJ
E-615	DARFIN
E-616	DARFOT
E-617	DARNOB
E-618	DARSEV
E-619	DASTEY01
E-620	DATHAJ
E-621	DATPIY
E-622	DAVYEG
E-623	DAWBIO
E-624	DAWBOU
E-625	DAWBUA
E-626	DAWCAH
E-627	DAWCIP
E-628	DAWCOV
E-629	DAWDAI
E-630	DAWWEF
E-631	DAWWIJ
E-632	DAXGUG
E-633	DAXHIV
E-634	DAXHIV01
E-635	DAXHUH
E-636	DAXHUH01
E-637	DAXKOE
E-638	DAXNOG
E-639	DAYYIN
E-640	DEBGIA
E-641	DEBNUU
E-642	DEBWAK
E-643	DEBWEO
E-644	DEFKUU
E-645	DEFRIR
E-646	DEGJIK
E-647	DEGPEL
E-648	DEHBIC
E-649	DEHLAF
E-650	DEHLIN
E-651	DEJCEB
E-652	DEJCIF
E-653	DEJRUH
E-654	DEKHEH
E-655	DEKHUX
E-656	DELGEI
E-657	DENKOX
E-658	DEPXAY
E-659	DEPXIG
E-660	DEPXOM
E-661	DEQFOU
E-662	DEQVIF
E-663	DEXZIR
E-664	DEYCAN
E-665	DEYDOA
E-666	DEYJIC
E-667	DEYJOI
E-668	DEYLUQ
E-669	DEYNIG
E-670	DEYVUA
E-671	DEYXIQ
E-672	DEZKAW
E-673	DEZKEA
E-674	DEZNED
E-675	DIBJEF
E-676	DIBJIJ
E-677	DIBPIP
E-678	DIBQEM
E-679	DIBQIQ
E-680	DIBQOW
E-681	DIBWUH
E-682	DIBWUI
E-683	DIBXAO
E-684	DIBXAP
E-685	DIBXIX
E-686	DIBXOD
E-687	DICKEH
E-688	DICVAO
E-689	DICVES
E-690	DICVIW
E-691	DIDBAV
E-692	DIDBEZ
E-693	DIDDOK
E-694	DIHPIU
E-695	DIMQOH
E-696	DIPMAS
E-697	DITJIB
E-698	DITJOH
E-699	DITYAH
E-700	DIXKOL
E-701	DIZQOT
E-702	DOCKOW
E-703	DODHUA
E-704	DODMIT
E-705	DOGZIJ
E-706	DOHYIJ
E-707	DOHYIJ01
E-708	DOKDEN
E-709	DOKHIV
E-710	DOKHOB
E-711	DOLXOR
E-712	DOLXOR01
E-713	DOLXOR02
E-714	DOMCUE
E-715	DONNEA
E-716	DOQGUM
E-717	DOQHAT
E-718	DOQHEX
E-719	DOQHIB
E-720	DOQHOH
E-721	DOQHUN
E-722	DOQKAW
E-723	DOQRUW
E-724	DORFOG
E-725	DORFUM
E-726	DOTTUC
E-727	DOTWAL
E-728	DOYLIM
E-729	DUBWON
E-730	DUCGEO
E-731	DUCHEP
E-732	DUFGOB
E-733	DUFZOU
E-734	DUFZUA
E-735	DUGBAJ
E-736	DUQCAU
E-737	DUQCAU01
E-738	DUQSEO
E-739	DUVNIS
E-740	DUVNIS01
E-741	DUXKEN
E-742	DUXKUD
E-743	DUXMAL
E-744	DUXZIG01
E-745	DUYRAR
E-746	DUYREV
E-747	DUYRIZ
E-748	DUYROF
E-749	EBANAY
E-750	EBATUY
E-751	EBELUU
E-752	EBEMEE
E-753	EBEMEF
E-754	EBEMII
E-755	EBETOW
E-756	EBEVAK
E-757	EBEWIT
E-758	EBEWOZ
E-759	EBEWOZ01
E-760	EBEXAM
E-761	EBEXEQ
E-762	EBEXEQ01
E-763	EBEZUI
E-764	EBIDIE
E-765	EBIDOK
E-766	EBIHII
E-767	EBIJAC
E-768	EBIMIN
E-769	EBIMOT
E-770	EBIPIQ
E-771	EBOJOV
E-772	EBOTOF
E-773	EBUFUE
E-774	EBUQIB
E-775	EBUQOH
E-776	EBUREA
E-777	ECAHAT
E-778	ECAHEX
E-779	ECAHOH
E-780	ECAHUN
E-781	ECASAD
E-782	ECASOS
E-783	ECEZAO
E-784	ECEZAO01
E-785	ECIWOC
E-786	ECIWUJ
E-787	ECODEG
E-788	ECODIK
E-789	ECOKAJ
E-790	ECOLEP
E-791	ECORIX
E-792	ECOROD
E-793	ECOSIY
E-794	ECOTOG
E-795	ECUCIP
E-796	ECUCOV
E-797	ECUCUB
E-798	ECUDAI
E-799	ECUDEM
E-800	ECUDIR
E-801	ECUDOX
E-802	ECUFAL
E-803	ECUFEP
E-804	ECUTON
E-805	EDABOC
E-806	EDADET
E-807	EDADIX
E-808	EDAFUM
E-809	EDAGAT
E-810	EDAGEX
E-811	EDAPIK
E-812	EDAVOV
E-813	EDEPAG
E-814	EDOMAM
E-815	EDORIY
E-816	EDOVEA
E-817	EDOVIE
E-818	EDUSIF
E-819	EDUVOO
E-820	EFAYEQ
E-821	EFAYIU
E-822	EFEGOM
E-823	EFOSUO
E-824	EFOTAV
E-825	EFOTEZ
E-826	EFOTID
E-827	EGATEM
E-828	EGATIQ
E-829	EGATOW
E-830	EGEHOO
E-831	EGEJIK
E-832	EGELUY
E-833	EGELUY01
E-834	EHALOP
E-835	EHEKUY
E-836	EHIJAH
E-837	EHODOV
E-838	EHUCOA
E-839	EJAXIW
E-840	EJEFOP
E-841	EJEGOQ
E-842	EJEHAD
E-843	EJIDUW01
E-844	EJIDUW02
E-845	EJONOH
E-846	EKARUE
E-847	EKEQIV
E-848	EKOPIE
E-849	EKOPOK
E-850	EKOPUQ
E-851	EKUPEG
E-852	ELAFUT
E-853	ELAZEX
E-854	ELELEN
E-855	ELERIX
E-856	ELERIX01
E-857	ELEROD
E-858	ELIJOZ
E-859	ELIJUF
E-860	ELIKAM
E-861	ELIKEQ
E-862	ELIKIU
E-863	ELIKOA
E-864	ELIKUG
E-865	ELILAN
E-866	ELILER
E-867	ELILIV
E-868	ELOFIU
E-869	ELOZEK
E-870	EMAFII
E-871	EMANAH
E-872	EMEGEJ
E-873	EMICUZ
E-874	EMIFOW
E-875	EMIGAJ
E-876	EMIGEN
E-877	EMIGIR
E-878	EMIGOX
E-879	EMIGUD
E-880	EMIHEO
E-881	EMITUQ
E-882	EMITUQ01
E-883	EMIYEF
E-884	EMOSOP
E-885	EMUYAM
E-886	ENAFAB
E-887	ENAFOP
E-888	ENISOK
E-889	ENISUQ
E-890	ENITAX
E-891	ENITEB
E-892	ENITIF
E-893	ENITOL
E-894	ENIXUV
E-895	ENUCOG
E-896	EPEWAY
E-897	EPEWAY01
E-898	EPEWEC
E-899	EPISOM
E-900	EPOTAF
E-901	EPOXAJ
E-902	EPUJIJ
E-903	EPUTUF
E-904	EPUVAN
E-905	EPUXET
E-906	EQERAU
E-907	EQEREY
E-908	EQERIC
E-909	EQIWAD
E-910	EQOCES
E-911	EQOCES01
E-912	EQOCIW
E-913	EQUBIC
E-914	EQUBOI
E-915	EQUBUO
E-916	EREFEN01
E-917	EREGOY
E-918	ERUFUS
E-919	ESATAU
E-920	ESEQUO
E-921	ESEVIH
E-922	ESIPUR
E-923	ESIPUR02
E-924	ESUMOU
E-925	ESUMOU01
E-926	ETAXIH
E-927	ETAXUT
E-928	ETAYAA
E-929	ETEJIX
E-930	ETEJIX01
E-931	ETEJOD01
E-932	ETEJUJ
E-933	ETEKAQ
E-934	ETEKAQ01
E-935	ETEKEU
E-936	ETESIG
E-937	ETUWOG
E-938	EVAKOB
E-939	EVEGER
E-940	EVOHOM
E-941	EVOMOR
E-942	EVOMOR01
E-943	EVOTIT
E-944	EVUBAY
E-945	EVUMUE
E-946	EVUNAL
E-947	EVUNEP
E-948	EVUNIT
E-949	EVUNOY
E-950	EVUQOC
E-951	EVUQUI
E-952	EVURAP
E-953	EWALUK
E-954	EWESIJ
E-955	EWEWUZ
E-956	EWIDUK
E-957	EWIMIH
E-958	EWIMON
E-959	EWUCOP
E-960	EWUSOF
E-961	EWUSUL
E-962	EWUTEW
E-963	EXEQAA
E-964	EXEQII
E-965	EXEWAG
E-966	EXEXAH
E-967	EXIBUI
E-968	EXIDEV
E-969	EXOTOB
E-970	EXOZEX
E-971	EXOZIB
E-972	EXUMOZ
E-973	EYACOX
E-974	EYULOA
E-975	EYUWAW
E-976	EZABEN
E-977	EZOBUR
E-978	EZOBUR02
E-979	EZOFEF
E-980	EZUCIM
E-981	EZUCOS
E-982	FABFOF
E-983	FACMIH
E-984	FACMIH01
E-985	FAFDEX
E-986	FAFGAU
E-987	FAFJIH
E-988	FAFMAC
E-989	FAGFUQ
E-990	FAGREM
E-991	FAHFUR
E-992	FAHGAY
E-993	FAHPOV
E-994	FAHTUE
E-995	FAHVAM
E-996	FAJYAS
E-997	FAKGOP
E-998	FAKLIO
E-999	FAKLOU
E-1000	FAKMAH
E-1001	FALBAX
E-1002	FALJAF
E-1003	FALQEQ
E-1004	FALQIU
E-1005	FALQOA
E-1006	FALVOF
E-1007	FALVUL
E-1008	FALVUL01
E-1009	FAMBUS
E-1010	FAMGAD
E-1011	FANQER
E-1012	FAPTIB
E-1013	FAPTOH
E-1014	FAPTUN
E-1015	FAPVAV
E-1016	FAPYEA04
E-1017	FAQGEL
E-1018	FAQGIP
E-1019	FAQVEA
E-1020	FAQYUR
E-1021	FARFIO
E-1022	FARFOU
E-1023	FARFUA
E-1024	FARHIR
E-1025	FARHOX
E-1026	FARYAA
E-1027	FASHAK
E-1028	FASHUD
E-1029	FASJAL
E-1030	FASQUN
E-1031	FASYUU
E-1032	FATBAE
E-1033	FATKAO
E-1034	FATKES
E-1035	FATKIV
E-1036	FATKIW
E-1037	FATKOC
E-1038	FATKUI
E-1039	FATLUJ
E-1040	FAVZEJ
E-1041	FAWCEN
E-1042	FAWCEN01
E-1043	FAWCEN02
E-1044	FAWCEN03
E-1045	FAYKOH
E-1046	FAYPAY
E-1047	FAYPEC
E-1048	FAYPIG
E-1049	FAYPOM
E-1050	FAYQAZ
E-1051	FAYQED
E-1052	FAYQIH
E-1053	FAYQON
E-1054	FAYQUT
E-1055	FAZFET
E-1056	FAZPED
E-1057	FAZRAA
E-1058	FAZZEM
E-1059	FEBXIV
E-1060	FECKAA
E-1061	FECWOB01
E-1062	FECXAO
E-1063	FECXES
E-1064	FECXUI
E-1065	FECYUJ
E-1066	FECZAQ
E-1067	FEDBEX
E-1068	FEDJUU
E-1069	FEFCUQ
E-1070	FEFDAX
E-1071	FEFDEB
E-1072	FEFZOF
E-1073	FEJKEM
E-1074	FELVEZ
E-1075	FELVID
E-1076	FELVOJ
E-1077	FELVUP
E-1078	FELWAW
E-1079	FELWEA
E-1080	FELWIE
E-1081	FELWOK
E-1082	FELWUQ
E-1083	FENVOL
E-1084	FEQSIF
E-1085	FERGUG
E-1086	FERHAN
E-1087	FERVIJ
E-1088	FERVOP
E-1089	FERWAC
E-1090	FESBIQ
E-1091	FEVDER
E-1092	FEVDIV
E-1093	FEVNEA
E-1094	FEVNIE
E-1095	FEVNOK
E-1096	FEVSAC
E-1097	FEVTEF
E-1098	FEVVIM
E-1099	FEWGUL
E-1100	FEWQIJ
E-1101	FEWQOP
E-1102	FEWTUY
E-1103	FEWWOV
E-1104	FEWWUB
E-1105	FEXCES
E-1106	FEXHOG
E-1107	FEXHOG01
E-1108	FEYJOJ
E-1109	FEYQIK
E-1110	FEZCOD
E-1111	FEZCUJ
E-1112	FEZREJ
E-1113	FIBHEF
E-1114	FIBHIJ
E-1115	FIDRIV
E-1116	FIFMIS
E-1117	FIFMIS01
E-1118	FIFMOX
E-1119	FIFMOY
E-1120	FIFMUD
E-1121	FIFNUE
E-1122	FIFNUE01
E-1123	FIFPAM
E-1124	FIFPAM01
E-1125	FIFPOA
E-1126	FIGQUJ
E-1127	FIGXAU
E-1128	FIGXAW
E-1129	FIGXEY
E-1130	FIHFAF
E-1131	FIHHUB
E-1132	FIHLOZ
E-1133	FIHLUF
E-1134	FIHRIZ
E-1135	FIHXUR
E-1136	FIJCUX
E-1137	FIJCUX01
E-1138	FIJDIM
E-1139	FIJDIM01
E-1140	FIJDIM02
E-1141	FIJDIM03
E-1142	FIJDIM04
E-1143	FIJDIM05
E-1144	FIJDIM06
E-1145	FIJDIM07
E-1146	FIJDIM08
E-1147	FIJDIM09
E-1148	FIJDIM10
E-1149	FIJDIM11
E-1150	FIJDIM12
E-1151	FIJDOS
E-1152	FIJDUY
E-1153	FIJFEK
E-1154	FIJFUA
E-1155	FIKQIB
E-1156	FIKTOK
E-1157	FILYEG
E-1158	FIMNIA
E-1159	FIMXUW
E-1160	FINQOK
E-1161	FINQUQ
E-1162	FIPWOS
E-1163	FIPWUY
E-1164	FIPXEJ
E-1165	FIQCEN
E-1166	FIQYOU
E-1167	FIQYUA
E-1168	FIRVEH
E-1169	FISPIH
E-1170	FITHAS
E-1171	FITJAU
E-1172	FITJEY
E-1173	FIVNAZ
E-1174	FIVYEP
E-1175	FIVYEP01
E-1176	FIVYUF
E-1177	FIYDOH
E-1178	FOHCAH
E-1179	FOHCIP
E-1180	FOHQUO
E-1181	FOHSAW01
E-1182	FONQIJ
E-1183	FOQSUA
E-1184	FORWAL
E-1185	FOXNIQ
E-1186	FOXQIT
E-1187	FUBDEM
E-1188	FUBDIQ
E-1189	FUDQIF
E-1190	FUFREE
E-1191	FULQOT
E-1192	FULQUZ
E-1193	FUNBAS
E-1194	FUNBEW
E-1195	FUNBIA
E-1196	FUNBOG
E-1197	FUNCAT
E-1198	FUNCEX
E-1199	FUQJUX
E-1200	FURQOZ
E-1201	FURQOZ01
E-1202	FURQUF
E-1203	FURRUG
E-1204	FURRUG01
E-1205	FURSAN
E-1206	FUSWIA
E-1207	FUSYUO
E-1208	FUTCAZ
E-1209	FUTDII
E-1210	FUTKEL
E-1211	FUTZOK
E-1212	FUWXOL
E-1213	FUWYAY
E-1214	FUYYAA
E-1215	FUYZAB
E-1216	FUZKAN
E-1217	GACPUX
E-1218	GACQAE
E-1219	GADMAA
E-1220	GAGXAP
E-1221	GAGZEV
E-1222	GAHWIX
E-1223	GAJTOC
E-1224	GAJTUI
E-1225	GAJVAQ
E-1226	GAJVEU
E-1227	GAJVIY
E-1228	GAJYUN
E-1229	GAJZAU
E-1230	GAJZEY
E-1231	GAJZIC
E-1232	GAJZOI
E-1233	GAJZUO
E-1234	GAKBAX
E-1235	GALCAZ
E-1236	GALCED
E-1237	GALHOS
E-1238	GAMTAQ
E-1239	GAMTEU
E-1240	GAMTIY
E-1241	GAMTUK
E-1242	GAMVAS
E-1243	GAMXAV
E-1244	GAQYIH
E-1245	GATBUZ
E-1246	GATHAL
E-1247	GATJIV
E-1248	GAWBEM
E-1249	GAWJEV
E-1250	GAWKAS
E-1251	GAWKEW
E-1252	GAWLIB
E-1253	GAWMAU
E-1254	GAWMOI
E-1255	GAXDIS10
E-1256	GAXGET
E-1257	GAXGIX
E-1258	GAXGOD
E-1259	GAXKOH
E-1260	GAXKUN
E-1261	GAXQIH
E-1262	GAXVUY
E-1263	GAXWAF
E-1264	GAXWEJ
E-1265	GAYFOD
E-1266	GAYFUJ
E-1267	GAYGAQ
E-1268	GAYPED
E-1269	GAYTEH
E-1270	GAZLAW
E-1271	GAZZIS
E-1272	GAZZIS01
E-1273	GAZZIS02
E-1274	GAZZIS03
E-1275	GAZZIS04
E-1276	GAZZIS05
E-1277	GEBCAT
E-1278	GECRAI
E-1279	GEDDAW
E-1280	GEDDEA
E-1281	GEDLIM
E-1282	GEDQIR
E-1283	GEDQOX
E-1284	GEDQUD
E-1285	GEDRAK
E-1286	GEDREO
E-1287	GEDRIS
E-1288	GEDROY
E-1289	GEDRUE
E-1290	GEDSAL
E-1291	GEDSEP
E-1292	GEDSOZ
E-1293	GEDSUF
E-1294	GEDTAM
E-1295	GEFFUT
E-1296	GEFYUN
E-1297	GEFZAU
E-1298	GEGDED
E-1299	GEGSIW
E-1300	GEGWAS
E-1301	GEHSAN
E-1302	GELJAJ
E-1303	GELVEZ
E-1304	GELVEZ01
E-1305	GELVEZ02
E-1306	GELVID
E-1307	GELVID01
E-1308	GENGIR
E-1309	GEPDEM
E-1310	GEPDIQ
E-1311	GERNOI
E-1312	GERPUP
E-1313	GERWEH
E-1314	GERWIL
E-1315	GERWOR
E-1316	GESBOW
E-1317	GESBUC
E-1318	GESDUF
E-1319	GESFAN
E-1320	GETXAG
E-1321	GETXEK
E-1322	GEVKID
E-1323	GEVXAI
E-1324	GEVXIQ
E-1325	GEWXAJ
E-1326	GEZFIC
E-1327	GEZFOI
E-1328	GEZRAG
E-1329	GIDKOU
E-1330	GIFFAE
E-1331	GIFFEI
E-1332	GIFKAH
E-1333	GIFKIP
E-1334	GIFSOF
E-1335	GIHBII
E-1336	GIHPAQ
E-1337	GIHPEU
E-1338	GIKMOD
E-1339	GIKMOD01
E-1340	GIKMOD02
E-1341	GIKMOD03
E-1342	GIKMOD04
E-1343	GIKMOD05
E-1344	GIKMOD06
E-1345	GIKMOD07
E-1346	GIKMOD08
E-1347	GIKMOD09
E-1348	GIKMOD10
E-1349	GIKMOD11
E-1350	GIKMOD12
E-1351	GIKQIC
E-1352	GIMSIG
E-1353	GIMVAA
E-1354	GINDEO
E-1355	GINLIA
E-1356	GIQXEK
E-1357	GIQXIO
E-1358	GIQXOU
E-1359	GIQXUA
E-1360	GIQYAH
E-1361	GIQYEL
E-1362	GIQYIP
E-1363	GIQYOV
E-1364	GIQYUB
E-1365	GIQZIQ
E-1366	GIRDUI
E-1367	GIRFUJ
E-1368	GIRGUL
E-1369	GITTOT
E-1370	GITTOT01
E-1371	GITTUZ
E-1372	GITVEL
E-1373	GITVEL01
E-1374	GITVIP
E-1375	GITWIQ
E-1376	GIWBEU
E-1377	GIWBIY
E-1378	GIWBOE
E-1379	GIWCAR
E-1380	GIWCIZ
E-1381	GIWCOF
E-1382	GIXGOK
E-1383	GIYSAJ
E-1384	GIYSAJ02
E-1385	GIYSEN
E-1386	GIYSIR
E-1387	GIYSOX
E-1388	GIYSUD
E-1389	GIYTAK
E-1390	GIYTIS
E-1391	GIZJOP
E-1392	GIZVER
E-1393	GOBGAG
E-1394	GOGSIF
E-1395	GOGWAB
E-1396	GOGWEF
E-1397	GOJDOZ
E-1398	GOJFAN
E-1399	GOJRED
E-1400	GOKBUE
E-1401	GOLQII
E-1402	GOMRAC
E-1403	GOMREG
E-1404	GUBVUU
E-1405	GUFREF
E-1406	GUJGAU
E-1407	GUJGEY
E-1408	GUJTOV
E-1409	GUJVIR
E-1410	GUJVOX
E-1411	GUKNIK
E-1412	GUKZAO
E-1413	GULGEZ
E-1414	GULPIN
E-1415	GULVUF
E-1416	GULWAM
E-1417	GULWEQ
E-1418	GULWIU
E-1419	GULWOA
E-1420	GUNFAW01
E-1421	GUPBEZ02
E-1422	GUPBOJ01
E-1423	GUPBUP
E-1424	GUPCAW
E-1425	GUPDEB
E-1426	GUPJEG
E-1427	GUPJEG01
E-1428	GUQTOB
E-1429	GURPUF
E-1430	GURTIX
E-1431	GURZID
E-1432	GUSCIH
E-1433	GUSJOU
E-1434	GUSMAJ
E-1435	GUSNEN
E-1436	GUSNEN01
E-1437	GUVLAL
E-1438	GUWDUY
E-1439	GUXJUF
E-1440	GUXLIU
E-1441	GUXPOF
E-1442	GUXQAR
E-1443	GUXRAT
E-1444	GUYLOC
E-1445	GUYLUI
E-1446	GUYLUI01
E-1447	GUYMAP
E-1448	HABQUY
E-1449	HABRAF
E-1450	HABREJ
E-1451	HABRIN
E-1452	HABZEQ
E-1453	HADQUA
E-1454	HAFQOW
E-1455	HAFQUC
E-1456	HAFTOZ
E-1457	HAFVOB
E-1458	HAFVUH
E-1459	HAFWAO
E-1460	HAFWUI
E-1461	HAFWUI01
E-1462	HAHPIQ
E-1463	HAJJAE
E-1464	HAJLEK
E-1465	HAJLIO
E-1466	HAJLOU
E-1467	HAJLUA
E-1468	HAJMAH
E-1469	HAJMEL
E-1470	HAKCAZ
E-1471	HAKCIG
E-1472	HAKWUM
E-1473	HAMJOW
E-1474	HAMREU
E-1475	HAMRIY
E-1476	HANWAW
E-1477	HAOAER
E-1478	HAPHUD
E-1479	HAPVAX
E-1480	HAPVEB
E-1481	HARNAR
E-1482	HASMIZ
E-1483	HASTAY
E-1484	HAWGIX
E-1485	HAWREE
E-1486	HAWWEJ
E-1487	HAWWIN
E-1488	HAWWOT
E-1489	HAWWUZ
E-1490	HAWYUB
E-1491	HAWZEM
E-1492	HAXJEX
E-1493	HAXMUP
E-1494	HAZGOF
E-1495	HAZGOF01
E-1496	HAZGOF02
E-1497	HAZGOF03
E-1498	HAZGOF04
E-1499	HAZGOF05
E-1500	HAZGOF06
E-1501	HAZGOF07
E-1502	HAZGOF08
E-1503	HAZNON
E-1504	HAZSIL
E-1505	HEBGUS
E-1506	HEBJAB
E-1507	HEBKEG
E-1508	HEBPUB
E-1509	HEBTAL
E-1510	HEBTEP
E-1511	HEDBEZ
E-1512	HEDBID
E-1513	HEDBOJ
E-1514	HEDBUP
E-1515	HEDCAW
E-1516	HEDCEA
E-1517	HEDCIE
E-1518	HEDGUS
E-1519	HEDTER
E-1520	HEFDED
E-1521	HEFDIH
E-1522	HEFDON
E-1523	HEFDUT
E-1524	HEFFAB
E-1525	HEFFEF
E-1526	HEFVAR
E-1527	HEGJUZ
E-1528	HEHCOO
E-1529	HEJHAH
E-1530	HEKTAU
E-1531	HEKTUO
E-1532	HELCUY
E-1533	HELDEJ
E-1534	HELDOT
E-1535	HENYUV
E-1536	HESVOR
E-1537	HETZUC
E-1538	HEWFUL
E-1539	HEXNII
E-1540	HEXVEM
E-1541	HEZKIH
E-1542	HEZSAG
E-1543	HEZSEK
E-1544	HGCNCO
E-1545	HIBGEF
E-1546	HIBGIJ
E-1547	HICVOG
E-1548	HICVUM
E-1549	HIDBON
E-1550	HIDMEO
E-1551	HIFGIO
E-1552	HIFGOU
E-1553	HIFTOG
E-1554	HIFTOG01
E-1555	HIFTOG02
E-1556	HIFTUM
E-1557	HIFVOI
E-1558	HIFVUO01
E-1559	HIFWAV
E-1560	HIFZAY
E-1561	HIGRIA
E-1562	HIHFOV
E-1563	HIHGAI
E-1564	HIHGEM
E-1565	HIHGIQ
E-1566	HIHGOW
E-1567	HIHGUC
E-1568	HIHNUJ
E-1569	HIMSAY
E-1570	HIWKEE
E-1571	HIWKII
E-1572	HIWLOO
E-1573	HIWXER
E-1574	HIWXER01
E-1575	HIXDOH01
E-1576	HIYBUN
E-1577	HIYYEU
E-1578	HIYZEV01
E-1579	HIZQEN
E-1580	HIZQUD
E-1581	HOGJIX
E-1582	HOGLEV
E-1583	HOGLEV01
E-1584	HOGSIG
E-1585	HOGTOM
E-1586	HOHMEX
E-1587	HOJLEY
E-1588	HOMXIR
E-1589	HOMZEP
E-1590	HOPHUP
E-1591	HORCOH
E-1592	HORCUN
E-1593	HOTWUJ
E-1594	HOWPOZ
E-1595	HOWPUF
E-1596	HOWQAM
E-1597	HOWQEQ
E-1598	HOWQOA
E-1599	HOXGEH
E-1600	HOXJIO
E-1601	HOXKIP
E-1602	HOXKUB
E-1603	HOYTUL
E-1604	HOZTOG
E-1605	HUCBAJ
E-1606	HUCBEN
E-1607	HUCLIB
E-1608	HUHJAW
E-1609	HUKQUZ
E-1610	HUMQUC
E-1611	HURGEH
E-1612	HURGOR
E-1613	HURGUX
E-1614	HURGUX01
E-1615	HURNOX
E-1616	HURQUG
E-1617	HUSGAE
E-1618	HUSQES
E-1619	HUTTIA
E-1620	HUTZEB
E-1621	HUXWAY
E-1622	HUYJOA
E-1623	HUYJUG
E-1624	HUYKAN
E-1625	HUYKUH
E-1626	HUZFIS
E-1627	HUZFOY
E-1628	HUZSOL
E-1629	HUZSOL01
E-1630	HUZSUR
E-1631	HUZSUR01
E-1632	IBARUA
E-1633	IBASAH
E-1634	IBASEL
E-1635	IBASOV
E-1636	IBASUB
E-1637	IBATAI
E-1638	IBATEM
E-1639	IBICAZ
E-1640	IBICED
E-1641	IBICIH
E-1642	IBICON
E-1643	IBICUT
E-1644	IBIDAA
E-1645	IBITUK
E-1646	IBIYOI
E-1647	IBOTAU
E-1648	IBOWIH
E-1649	IBOZIK
E-1650	IBUDOZ
E-1651	IBUYAH
E-1652	ICAGAU
E-1653	ICAGOK
E-1654	ICALOP
E-1655	ICALUV
E-1656	ICAMEG
E-1657	ICANAD
E-1658	ICANEH
E-1659	ICAQIO
E-1660	ICAQOU
E-1661	ICARAH
E-1662	ICAREL
E-1663	ICAROV
E-1664	ICAWUF
E-1665	ICEGED
E-1666	ICITEU
E-1667	ICITUK
E-1668	ICIVAS
E-1669	ICIZAV
E-1670	ICIZOL
E-1671	ICODIP
E-1672	ICODIP01
E-1673	ICORAV
E-1674	ICOWON
E-1675	ICOYIK
E-1676	IDAGEA
E-1677	IDAGOL
E-1678	IDAGUR
E-1679	IDAZEU
E-1680	IDORIE
E-1681	IDUDES
E-1682	IDUDIW
E-1683	IFAGON
E-1684	IFAQUC
E-1685	IFAREN
E-1686	IFASOZ
E-1687	IFEHUY
E-1688	IFENOY
E-1689	IFENOY01
E-1690	IFENOY02
E-1691	IFENOY03
E-1692	IFEPIT
E-1693	IFEPUG
E-1694	IFEQAN
E-1695	IFEQIV
E-1696	IFEYIB
E-1697	IFOSIG
E-1698	IFUDAO
E-1699	IFUDES
E-1700	IFUNUU
E-1701	IFUPAC
E-1702	IGAGUU
E-1703	IGAHAB
E-1704	IGAHED
E-1705	IGAHED01
E-1706	IGAHED02
E-1707	IGOCOX
E-1708	IHIWIF
E-1709	IJANAJ
E-1710	IJANEN
E-1711	IJASAO
E-1712	IJASAO01
E-1713	IJASES
E-1714	IJASES01
E-1715	IJASIW
E-1716	IJASOC
E-1717	IJENER
E-1718	IJEXUR
E-1719	IJIROI
E-1720	IJISOK
E-1721	IJOMOJ02
E-1722	IJOMOJ04
E-1723	IJOMOJ06
E-1724	IJOMOJ07
E-1725	IKAYAU
E-1726	IKEBUV
E-1727	IKEBUV01
E-1728	IKETAU
E-1729	IKETEY
E-1730	IKETIC
E-1731	IKETOH
E-1732	IKETOI
E-1733	IKETUO
E-1734	IKEVAW
E-1735	IKOSOQ
E-1736	IKOSUW
E-1737	ILAGUY
E-1738	ILIFOY
E-1739	ILIFUE
E-1740	ILIGAL
E-1741	ILIGEP
E-1742	ILITUT
E-1743	ILOJEZ
E-1744	ILOJOJ
E-1745	ILOTOT
E-1746	ILUFEB
E-1747	ILUFIF
E-1748	ILUFOL
E-1749	ILUFUR
E-1750	ILUGAY
E-1751	ILUGOM
E-1752	ILUHIH
E-1753	ILUHON
E-1754	ILUHUT
E-1755	ILUJAB
E-1756	ILUJEF
E-1757	ILUJIJ
E-1758	IMACZN01
E-1759	IMIDZB10
E-1760	IMISED
E-1761	IMISIH
E-1762	IMIXIM
E-1763	IMUTUG
E-1764	IMUVAO
E-1765	INAMUG
E-1766	INEBOT
E-1767	INESIE
E-1768	INIQUR
E-1769	INIRAY
E-1770	INIRAY01
E-1771	INOVEN
E-1772	INURIS
E-1773	IPICUG
E-1774	IPIDUH
E-1775	IPIFAP
E-1776	IPIJUM
E-1777	IPOWOA
E-1778	IQEWOQ
E-1779	IQIJIC
E-1780	IQIPAZ
E-1781	IQOZUJ
E-1782	IQUNAJ
E-1783	IQUNAJ01
E-1784	IRAGEN
E-1785	IRAYUW
E-1786	IRISAD01
E-1787	ISACIP
E-1788	ISAYOQ
E-1789	ISENUQ
E-1790	ISEQIH
E-1791	ISIKIF
E-1792	ISIKOL
E-1793	ISIMAZ
E-1794	ISOHEE
E-1795	ISUCUV
E-1796	ISUGIN
E-1797	ISUGOT
E-1798	ISUXAW
E-1799	ITAHEQ
E-1800	ITETEH
E-1801	ITIBET
E-1802	ITIBOD
E-1803	ITIWIS
E-1804	ITIWOY
E-1805	ITIWUE
E-1806	IVARUT
E-1807	IVEGEV
E-1808	IVEHEW
E-1809	IVETOT
E-1810	IWELIG
E-1811	IWELIG01
E-1812	IWELOM
E-1813	IWEPUW
E-1814	IXAJUN
E-1815	IXAKAU
E-1816	IXEDOE
E-1817	IXEDUK
E-1818	IXEFAS
E-1819	IXEQIL
E-1820	IXISAJ
E-1821	IXISOX
E-1822	IXODUV
E-1823	IXOFAD
E-1824	IXOFEH
E-1825	IXOFIL
E-1826	IXOFOR
E-1827	IXOFUX
E-1828	IXOFUX01
E-1829	IXUHUE
E-1830	IXUQUO
E-1831	IXURAV
E-1832	IXUREZ
E-1833	IXURID
E-1834	IXUWII
E-1835	IXUWOO
E-1836	IYICUP
E-1837	IYIGEC
E-1838	IYIHUU
E-1839	IYOBAA
E-1840	IYOHOU
E-1841	IYOWID
E-1842	IYUHIU
E-1843	IYUHUG
E-1844	IYUJAO
E-1845	IYUQEZ
E-1846	IYUREA
E-1847	IYUSAX
E-1848	IZEBAR
E-1849	IZEBEV
E-1850	IZEFEZ
E-1851	IZEHAX
E-1852	IZEPAF
E-1853	IZEPEJ
E-1854	IZOWAW
E-1855	IZOWEA
E-1856	IZUMUM
E-1857	JACQUA
E-1858	JAHNEM
E-1859	JAHXUM
E-1860	JASNAT
E-1861	JASNEX
E-1862	JAVNIE
E-1863	JAVTAC
E-1864	JAVWUY
E-1865	JEBCOJ
E-1866	JEBDOK
E-1867	JEDJUY
E-1868	JEDKEJ
E-1869	JEJKEP
E-1870	JEJWEB
E-1871	JEJWIF
E-1872	JEJWOL
E-1873	JEMNAR
E-1874	JEMQEY
E-1875	JENKET
E-1876	JETNOL
E-1877	JETZAK
E-1878	JEWCAP
E-1879	JEWYAM
E-1880	JEXSOV
E-1881	JILXOS
E-1882	JIQVAH
E-1883	JISVAJ
E-1884	JITPOS
E-1885	JIVFUQ
E-1886	JIVHIG
E-1887	JIWKUW
E-1888	JIXWUJ
E-1889	JIXWUJ01
E-1890	JIYXUL
E-1891	JOCPIB
E-1892	JODGEP
E-1893	JOGBIR
E-1894	JOGDAL
E-1895	JOHFIW
E-1896	JOJLOK
E-1897	JOJMEB
E-1898	JOSNAG
E-1899	JOSNAG01
E-1900	JOVDON
E-1901	JUCXEK
E-1902	JUPFOP
E-1903	JUTCUW
E-1904	KABXES
E-1905	KABXIW
E-1906	KABXOC
E-1907	KACZEV
E-1908	KACZIZ
E-1909	KAFTUI
E-1910	KAFYAT
E-1911	KAGCAY
E-1912	KAHNOX
E-1913	KALFIO
E-1914	KALFOU
E-1915	KALGAH
E-1916	KALGEL
E-1917	KAMZUV
E-1918	KANCIN
E-1919	KANDEK
E-1920	KANDIO
E-1921	KANMIX
E-1922	KAPGUE
E-1923	KAPHAL
E-1924	KAPHOZ
E-1925	KARLIA
E-1926	KARLUM
E-1927	KARMAT
E-1928	KARNAU
E-1929	KASPOL
E-1930	KASRAZ
E-1931	KATDAM
E-1932	KAVGAQ
E-1933	KAVJAT
E-1934	KAVJEX01
E-1935	KAVKIC
E-1936	KAVLID
E-1937	KAVREG
E-1938	KAVRIK
E-1939	KAVROQ
E-1940	KAVTUY
E-1941	KAWBOB
E-1942	KAXQIL
E-1943	KAXQOR
E-1944	KAXQOR01
E-1945	KAXZUG
E-1946	KAYBIX
E-1947	KAYBUJ
E-1948	KAYCIY
E-1949	KEBDIG
E-1950	KECRAL10
E-1951	KEDPEQ
E-1952	KEDQAN
E-1953	KEFBEE
E-1954	KEFBII
E-1955	KEFBOO
E-1956	KEFWEZ
E-1957	KEFWID
E-1958	KEGYAX
E-1959	KEHGAH
E-1960	KEHGOV
E-1961	KEJBOQ
E-1962	KEJHIQ
E-1963	KEJQAR01
E-1964	KENJEU
E-1965	KEQDER
E-1966	KEQZAJ
E-1967	KESBIU
E-1968	KESBIU01
E-1969	KESGAS
E-1970	KESHAT
E-1971	KETHEY
E-1972	KETSEI
E-1973	KEVVIS
E-1974	KEVWUF
E-1975	KEWZOD
E-1976	KEXFAU
E-1977	KEXKAB
E-1978	KEXKEF
E-1979	KEXPOU
E-1980	KEYDEZ
E-1981	KEYYET
E-1982	KIBDEF
E-1983	KIBDIJ
E-1984	KIBXUP
E-1985	KIBYAW
E-1986	KICXAX
E-1987	KICXEB
E-1988	KIDDIM
E-1989	KIDDOS
E-1990	KIDVIE
E-1991	KIFJIT
E-1992	KIFJUF
E-1993	KIFKAM
E-1994	KIFKEQ
E-1995	KIFWUT
E-1996	KIFXOO
E-1997	KIGCEK
E-1998	KIHTOL
E-1999	KIJRUS
[truncated: 2,765 more rows]
